# Supplementary material
Source: HighWire-hosted journal article supplement (https://bjsm.bmj.com/content/52/6/385)
Supplement: inline-supplementary-material-3 [file inline-supplementary-material-3.docx]

| **Study ID** | **random sequence generation** | **allocation concealment** | **blinding of participants and personnel** | **blinding of outcome assessment** | **incomplete outcome data** | **selective reporting** | **Baseline Characteristics (other bias)** | **Clinicians experience (other bias)** | **Co-interventions (other bias)** | **Compliance (other bias)** |
| --- | --- | --- | --- | --- | --- | --- | --- | --- | --- | --- |
| **Abd Elhafz 2011** | U | U | U | U | L | U | U | U | U | U |
| **Abrahams 2003** | U | U | H | H | U | U | L | U | L | U |
| **Avraham 2007** | U | U | H | H | H | L | U | U | U | U |
| **Bakhtiary 2008** | L | L | H | H | U | U | L | U | U | U |
| **Balci 2009** | U | U | H | H | U | L | H | U | U | U |
| **Clark 2000** | L | H | H | H | U | L | L | U | U | U |
| **Colón 1988** | H | H | H | H | H | H | U | U | U | U |
| **De Marche 2014 (Baldon)** | L | L | U | H | L | L | H | U | U | U |
| **Dolak 2011** | L | H | H | H | H | L | L | U | U | U |
| **Eburne 1996** | H | H | H | H | H | U | H | H | U | U |
| **Fukuda 2010** | L | L | H | H | L | L | L | L | U | L |
| **Fukuda 2012** | L | L | H | H | L | L | L | L | U | L |
| **Gaffney 1992** | U | U | H | H | U | L | H | U | U | L |
| **FRANSK: Gobelet 1992** | U | U | H | H | H | U | U | U | U | U |
| **Hafez 2012** | U | U | H | H | U | L | U | U | U | U |
| **Harrison 1999** | L | U | H | H | H | U | L | U | U | U |
| **Herrington 2007** | L | L | H | H | L | L | L | U | U | U |
| **Khayambashi 2012** | H | H | U | U | U | H | L | U | U | U |
| **Khayambashi 2014** | H | H | H | H | L | L | L | U | U | L |
| **Loudon 2004** | H | H | H | H | U | L | H | U | U | L |
| **Lun 2005** | L | U | H | H | H | L | L | U | U | L |
| **Moyano 2013** | L | L | H | H | L | L | L | U | U | U |
| **Nakagawa 2008** | L | L | U | U | L | U | L | U | U | U |
| **Razeghi 2010** | U | U | H | H | L | U | U | U | U | U |
| **Schneider 2001** | U | U | H | H | U | L | H | U | U | U |
| **Song 2009** | L | L | H | H | L | L | L | U | U | L |
| **Taylor 2003** | L | L | U | U | L | L | U | U | U | U |
| **Thomee 1997** | H | H | H | H | L | U | U | U | U | U |
| **Van Linschoten 2009** | L | L | H | H | L | L | L | U | L | U |
| **Witvrouw 2000** | L | L | H | H | L | L | L | L | L | L |
| **Østeråsa 2013** | L | L | H | H | L | L | L | U | U | U |
| **Ferber 2015** | L | L | H | L | U | U | L | U | U | L |
| **Halabchi 2015** | L | L | H | U | L | L | L | U | U | U |
| **Jehoon 2014** | L | U | H | H | L | U | L | U | U | U |
| **Karakus 2014** | U | U | U | H | H | U | L | U | U | U |
| **Rathleff 2015** | U | L | H | L | L | L | L | U | L | L |
| **Sahin 2016** | L | U | H | H | L | U | L | U | U | U |
| **Yilmaz Yelvar 2015** | H | U | H | L | L | U | L | U | U | U |
